# Supplementary material for: Mechanistic studies on the addition of hydrogen to iridaepoxide complexes with subsequent elimination of water
Source: Royal Society of Chemistry journal article supplement (doi:10.1039/c5sc03575a), 2015-10-27
Supplement: c5sc03575a1.pdf [file c5sc03575a1.pdf]

## Electronic Supporting Information

### Mechanistic studies on the addition of hydrogen to iridaepoxide complexes with subsequent elimination of water.

Lauren E. Doyle, Warren E. Piers,\* Javier Borau-Garcia, Michael J. Sgro, Denis M. Spasyuk

University of Calgary, Department of Chemistry, 2500 University Drive N.W., Calgary, Alberta, Canada, T2N 1N4.

#### Contents

|                                                                                                                                    |    |
|------------------------------------------------------------------------------------------------------------------------------------|----|
| General Considerations                                                                                                             | S2 |
| <b>Figure S1.</b> Van't Hoff plots and H <sub>2</sub> concentrations                                                               | S3 |
| <b>Figure S2.</b> Molecular structure of <b>1•Br</b> .                                                                             | S3 |
| <b>Figure S3.</b> Conversion between <b>7•(OTf)<sub>2</sub>Cl</b> and <b>8</b> .                                                   | S4 |
| <b>Figure S4.</b> <sup>1</sup> H NMR spectrum of <b>1•OH</b> in toluene- <i>d</i> <sub>8</sub> .                                   | S4 |
| <b>Figure S5.</b> <sup>13</sup> C{ <sup>1</sup> H} NMR spectrum of <b>1•OH</b> in toluene- <i>d</i> <sub>8</sub> .                 | S5 |
| <b>Figure S6.</b> <sup>1</sup> H NMR spectrum of <b>1•Br</b> in toluene- <i>d</i> <sub>8</sub> .                                   | S5 |
| <b>Figure S7.</b> <sup>13</sup> C{ <sup>1</sup> H} NMR spectrum of <b>1•Br</b> in toluene- <i>d</i> <sub>8</sub> .                 | S5 |
| <b>Figure S8.</b> <sup>1</sup> H NMR spectrum of <b>2•Br<sub>trans</sub></b> in toluene- <i>d</i> <sub>8</sub> .                   | S6 |
| <b>Figure S9.</b> <sup>13</sup> C{ <sup>1</sup> H} NMR spectrum of <b>2•Br<sub>trans</sub></b> in toluene- <i>d</i> <sub>8</sub> . | S6 |
| <b>Figure S10.</b> <sup>1</sup> H NMR spectrum of <b>3•OH</b> in toluene- <i>d</i> <sub>8</sub> .                                  | S6 |
| <b>Figure S11.</b> <sup>13</sup> C{ <sup>1</sup> H} NMR spectrum of <b>3•OH</b> in toluene- <i>d</i> <sub>8</sub> .                | S7 |
| <b>Figure S12.</b> <sup>1</sup> H NMR spectrum of <b>3•Br</b> in CD <sub>2</sub> Cl <sub>2</sub> .                                 | S7 |
| <b>Figure S13.</b> <sup>13</sup> C{ <sup>1</sup> H} NMR spectrum of <b>3•Br</b> in CD <sub>2</sub> Cl <sub>2</sub> .               | S7 |
| <b>Figure S14.</b> <sup>1</sup> H NMR spectrum of <b>4</b> in toluene- <i>d</i> <sub>8</sub> .                                     | S8 |
| <b>Figure S15.</b> <sup>13</sup> C{ <sup>1</sup> H} NMR spectrum of <b>4</b> in toluene- <i>d</i> <sub>8</sub> .                   | S8 |
| <b>Figure S16.</b> <sup>31</sup> P{ <sup>1</sup> H} NMR spectrum of <b>4</b> in toluene- <i>d</i> <sub>8</sub> .                   | S8 |

|                                                                                                                                |     |
|--------------------------------------------------------------------------------------------------------------------------------|-----|
| <b>Figure S17.</b> $^1\text{H}$ NMR spectrum of $7\cdot\text{Cl}_3$ in $\text{CD}_2\text{Cl}_2$ .                              | S9  |
| <b>Figure S18.</b> $^1\text{H}$ NMR spectrum of $7\cdot(\text{OTf})_2\text{Cl}$ in $\text{CD}_2\text{Cl}_2$ .                  | S9  |
| <b>Figure S19.</b> $^{13}\text{C}\{^1\text{H}\}$ NMR spectrum of $7\cdot(\text{OTf})_2\text{Cl}$ in $\text{CD}_2\text{Cl}_2$ . | S9  |
| <b>Figure S20.</b> $^2\text{H}$ NMR spectrum of $2\cdot\text{Cl}_{\text{trans}}\text{-d}_2$ in toluene.                        | S10 |
| <b>Table S1.</b> Data collection and structure refinement details                                                              | S11 |

**General Considerations.** Storage and manipulation of all compounds were performed under an argon atmosphere either in a VAC glove box or using a double manifold high vacuum line using standard techniques. Toluene, pentane and hexanes were dried and purified using a Grubbs/Dow solvent purification system and stored in 500 mL thick-walled vessels over sodium/benzophenone ketal. Dichloromethane and dichloromethane- $d_2$  were dried over calcium hydride and vacuum transferred into thick-walled vessels for storage over activated sieves. Toluene- $d_8$  was dried and stored over sodium/benzophenone ketal. All dried solvents were degassed and vacuum distilled prior to use.  $^1\text{H}$  and  $^{13}\text{C}$  NMR chemical shifts were referenced to residual solvent protons and naturally abundant  $^{13}\text{C}$  resonances for all deuterated solvents. Chemical shift assignments are based on  $^1\text{H}$ ,  $^{13}\text{C}\{^1\text{H}\}$ ,  $^{31}\text{P}\{^1\text{H}\}$ ,  $^{19}\text{F}$ ,  $^1\text{H}$ - $^1\text{H}$ -COSY,  $^1\text{H}$ - $^{13}\text{C}$ -HSQC and  $^1\text{H}$ - $^{13}\text{C}$ -HMBC NMR experiments performed on Bruker RDQ-400, Ascend-500 or Avance-600 spectrometers. Deuterium (99.7%) and Ultra High Purity Hydrogen were purchased from Praxair and used as received. Nitrous oxide (99%) and deuterium hydride (96 mol%, 98 atom % D) were purchased from Sigma-Aldrich and used as received. All other reagents were purchased from Sigma-Aldrich and used as received. X-ray crystallographic analyses were performed on either a Nonius KappaCCD diffractometer or a Bruker Smart diffractometer equipped with Apex II detector. Samples were coated in Paratone 8277 oil (Exxon) and mounted on a glass fibre. Full crystallography details can be found in independently uploaded .cif files. All Elemental analyses were obtained by the Instrumentation Facility of the Department of Chemistry, University of Calgary.

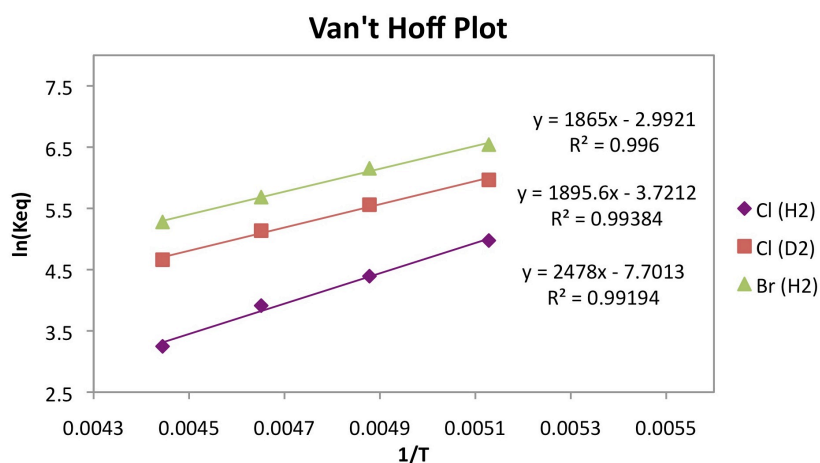

$$K_{eq} = \frac{[2 \cdot X_{cis}]}{[1 \cdot X][H_2]}$$

| T (°C) | [H <sub>2</sub> ] (mM) |
|--------|------------------------|
| -78    | 3.07                   |
| -68    | 3.27                   |
| -58    | 3.47                   |
| -48    | 3.67                   |

**Figure S1.** *Left:* Van't Hoff plots depicting the equilibrium of **1•Cl** and **2•Cl<sub>cis</sub>** with H<sub>2</sub> (purple diamonds), **1•Cl** and **2•Cl<sub>cis</sub>** with D<sub>2</sub> (red squares) and **1•Br** and **2•Br<sub>cis</sub>** with H<sub>2</sub> (green triangles). *Right:* Equation for the equilibrium constant and concentrations of H<sub>2</sub> (mM) in CD<sub>2</sub>Cl<sub>2</sub> at varying temperatures measured by <sup>1</sup>H NMR spectroscopy.

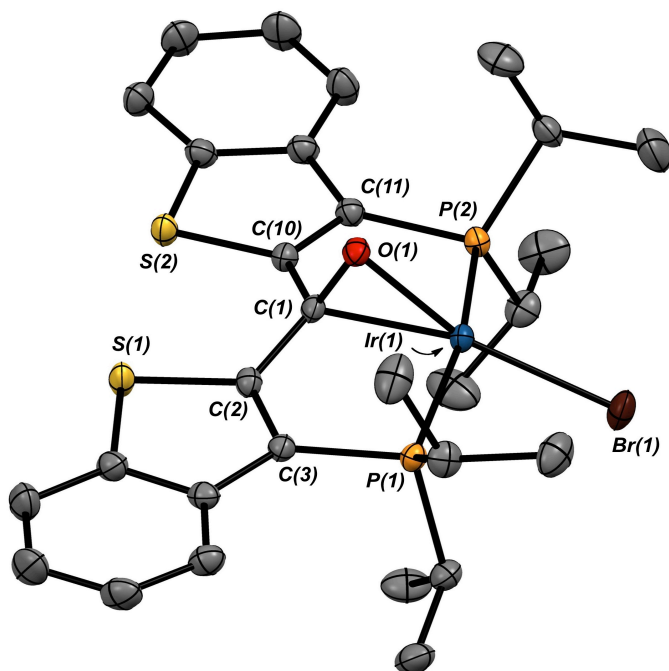

**Figure S2.** Molecular structure of **1•Br**. Hydrogen atoms have been omitted for clarity. Displacement ellipsoids are shown at the 50% probability level. Selected bond lengths (Å): Ir(1)-P(1), 2.3214(6); Ir(1)-P(2), 2.3234(6); Ir(1)-C(1), 2.4387(3); Ir(1)-O(1), 2.0489(17); Ir(1)-Br(1), 2.4387(3); C(1)-O(1), 1.355(3). Selected bond angles (°): C(1)-Ir(1)-O(1), 38.23(8); C(1)-O(1)-Ir(1), 72.42(12); Ir(1)-C(1)-O(1), 69.36(12); P(1)-Ir(1)-P(2), 162.57(2).

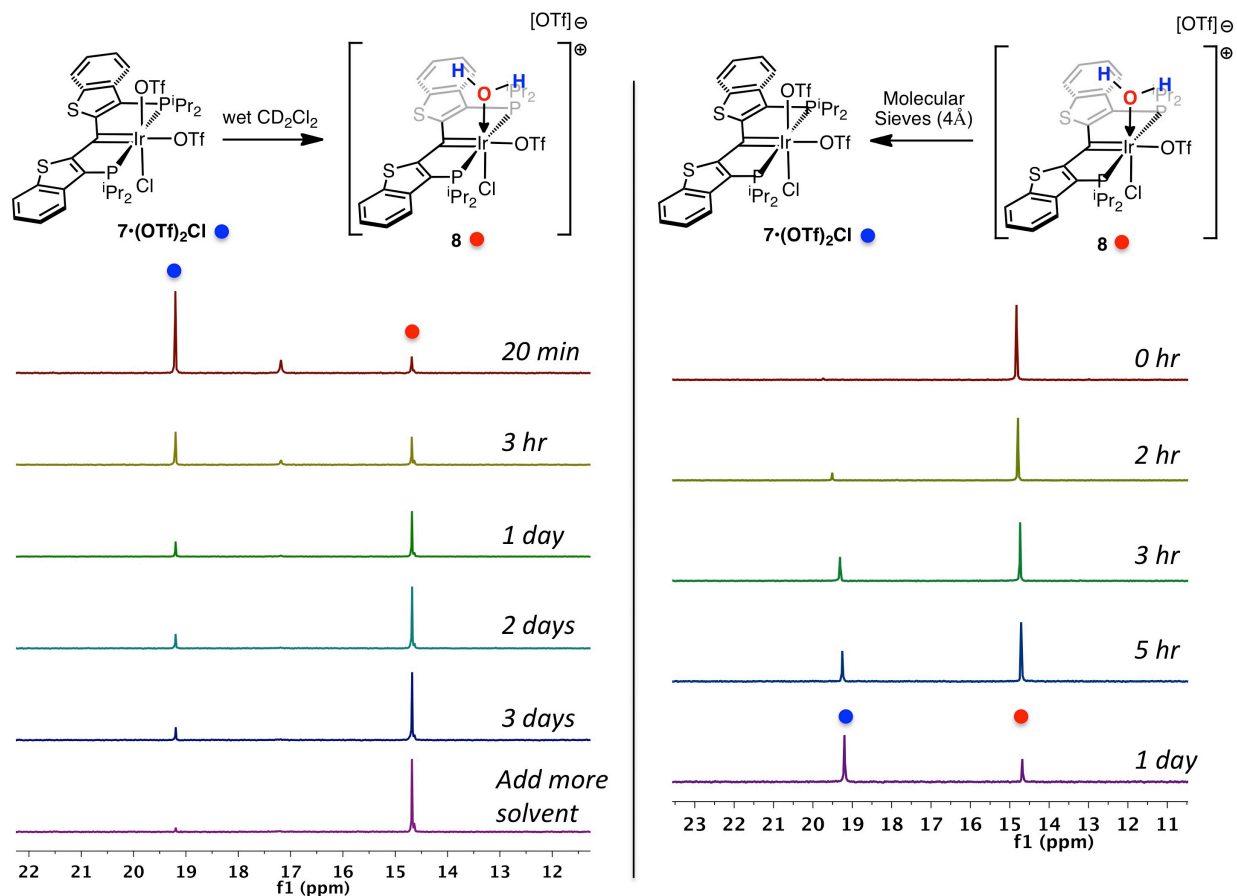

**Figure S3.** *Left:*  $^{31}\text{P}\{^1\text{H}\}$  NMR spectra ( $\text{CD}_2\text{Cl}_2$ , 203 MHz, 25 °C) of **7**·(OTf) $_2$ Cl dissolved in wet  $\text{CD}_2\text{Cl}_2$  over time. The bottom spectrum was taken after more  $\text{CD}_2\text{Cl}_2$  (wet) was added to the sample. *Right:*  $^{31}\text{P}\{^1\text{H}\}$  NMR spectra ( $\text{CD}_2\text{Cl}_2$ , 203 MHz, 25 °C) over time of a solution of **8** mixed with a few activated molecular sieves (4 Å).

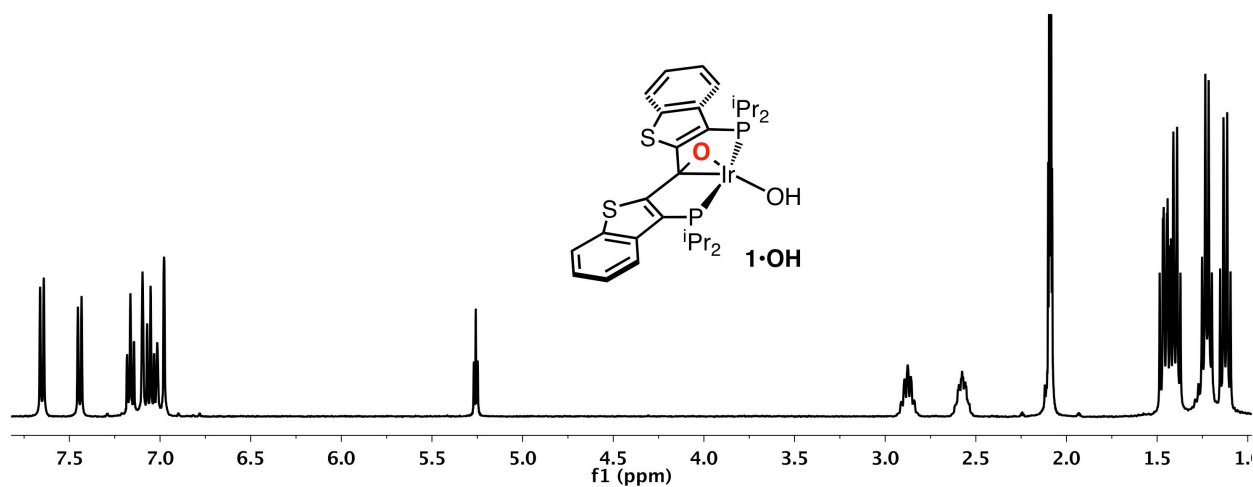

**Figure S4.**  $^1\text{H}$  NMR spectrum of **1**·OH in  $\text{toluene-}d_8$ .

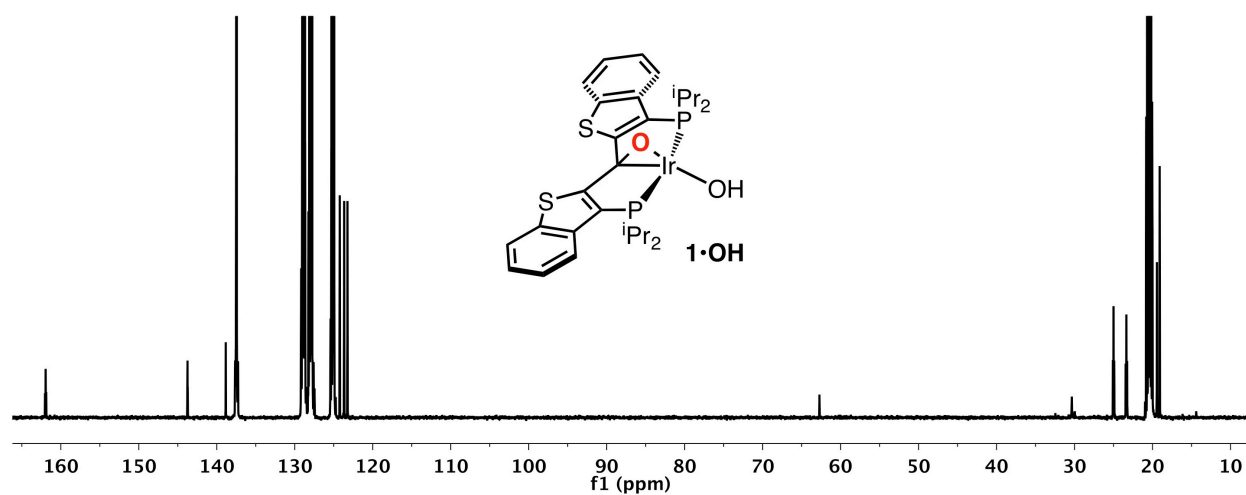

**Figure S5.**  $^{13}\text{C}\{^1\text{H}\}$  NMR spectrum of **1•OH** in  $\text{toluene-}d_8$ .

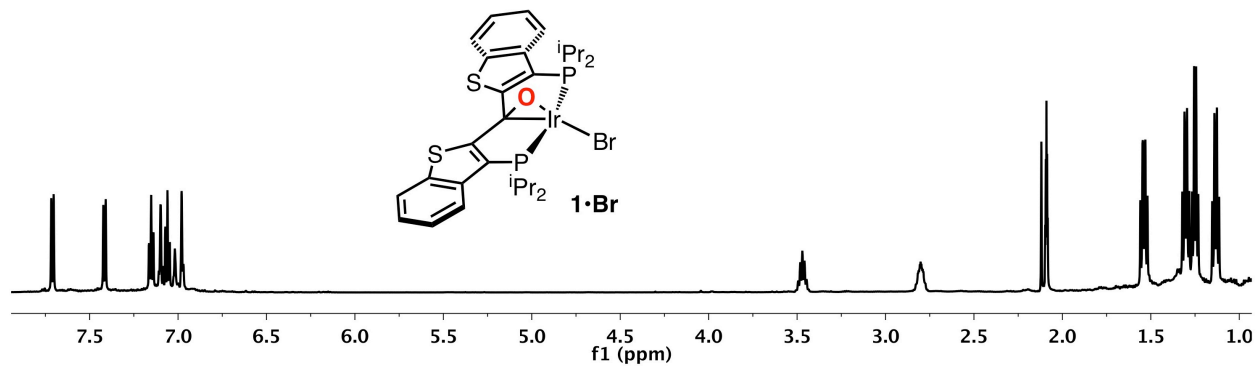

**Figure S6.**  $^1\text{H}$  NMR spectrum of **1•Br** in  $\text{toluene-}d_8$ .

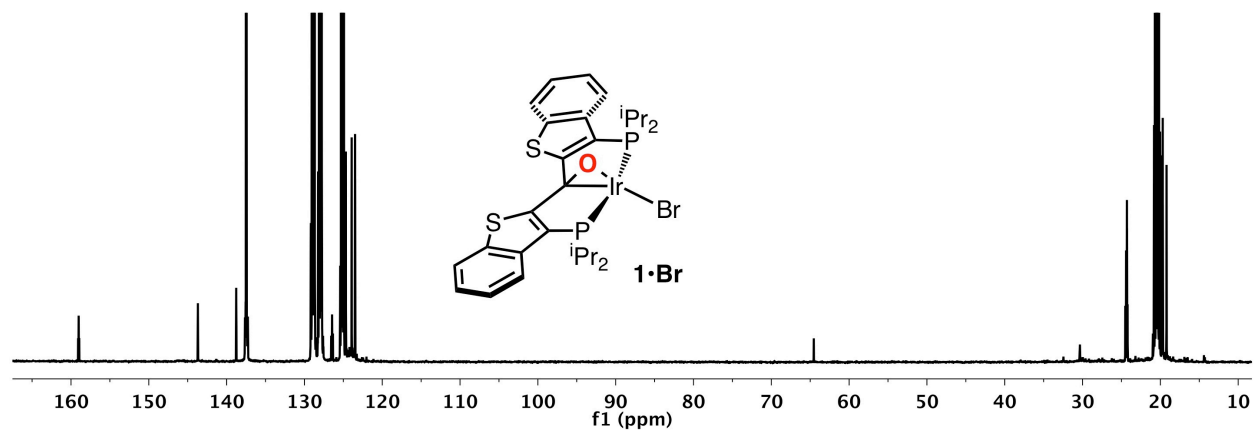

**Figure S7.**  $^{13}\text{C}\{^1\text{H}\}$  NMR spectrum of **1•Br** in  $\text{toluene-}d_8$ .

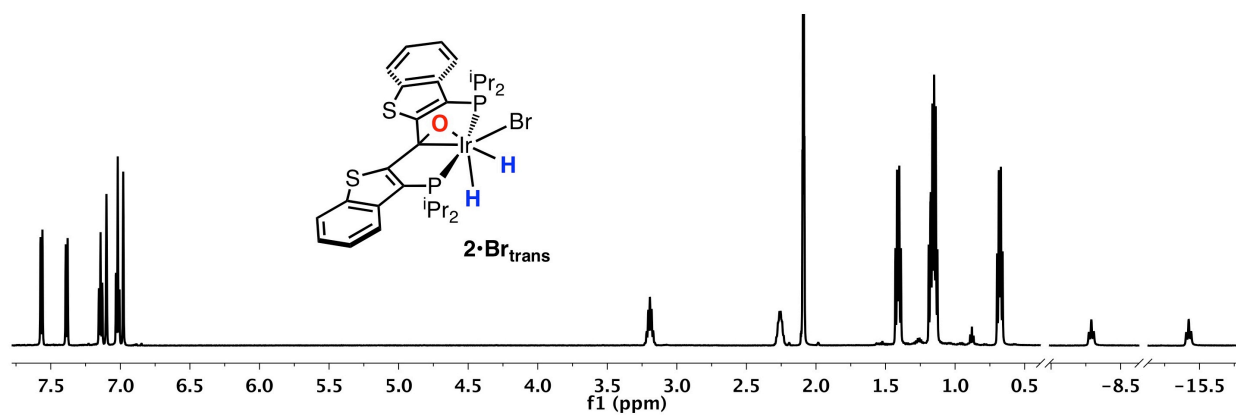

**Figure S8.**  $^1\text{H}$  NMR spectrum of  $2\cdot\text{Br}_{\text{trans}}$  in  $\text{toluene-}d_8$ .

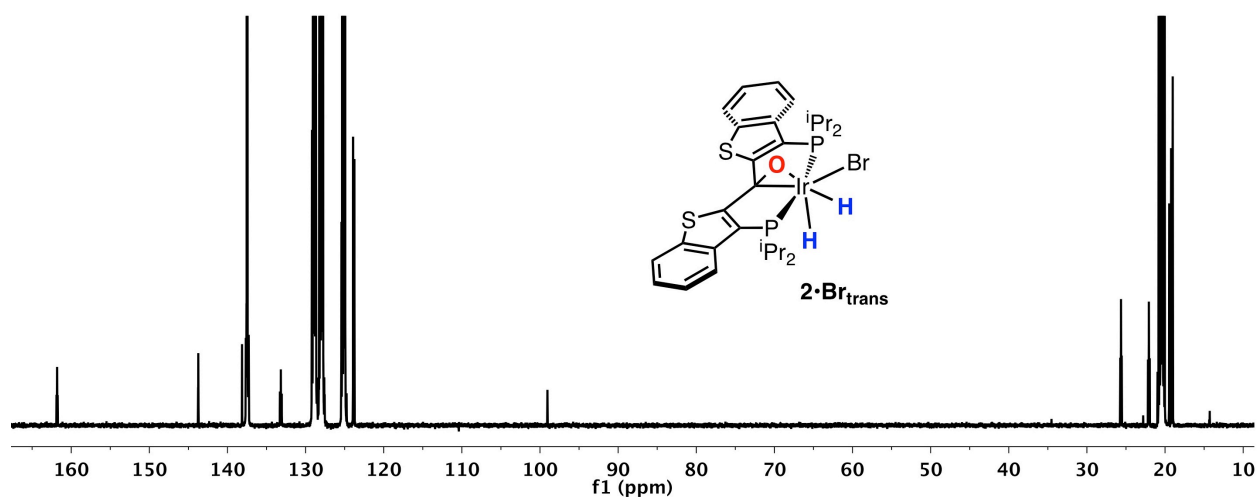

**Figure S9.**  $^{13}\text{C}\{^1\text{H}\}$  NMR spectrum of  $2\cdot\text{Br}_{\text{trans}}$  in  $\text{toluene-}d_8$ .

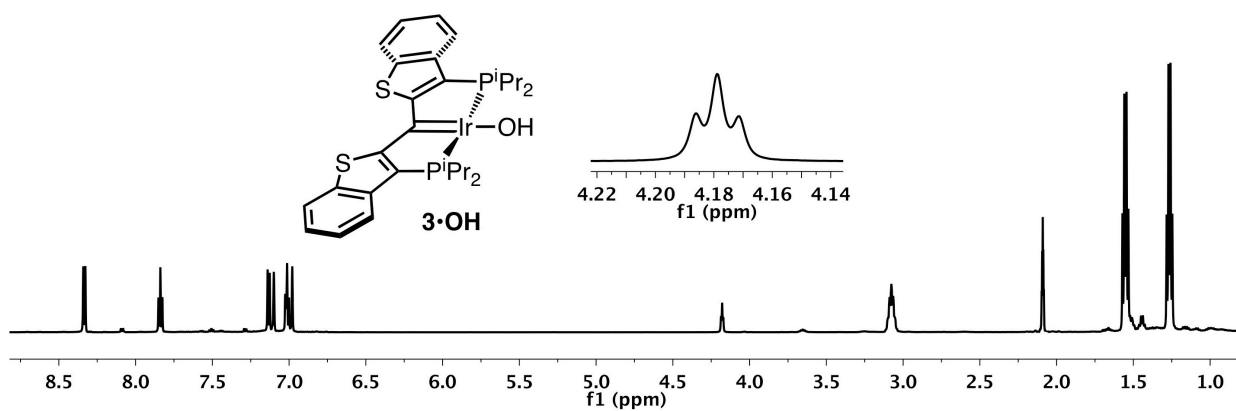

**Figure S10.**  $^1\text{H}$  NMR spectrum of  $3\cdot\text{OH}$  in  $\text{toluene-}d_8$ .

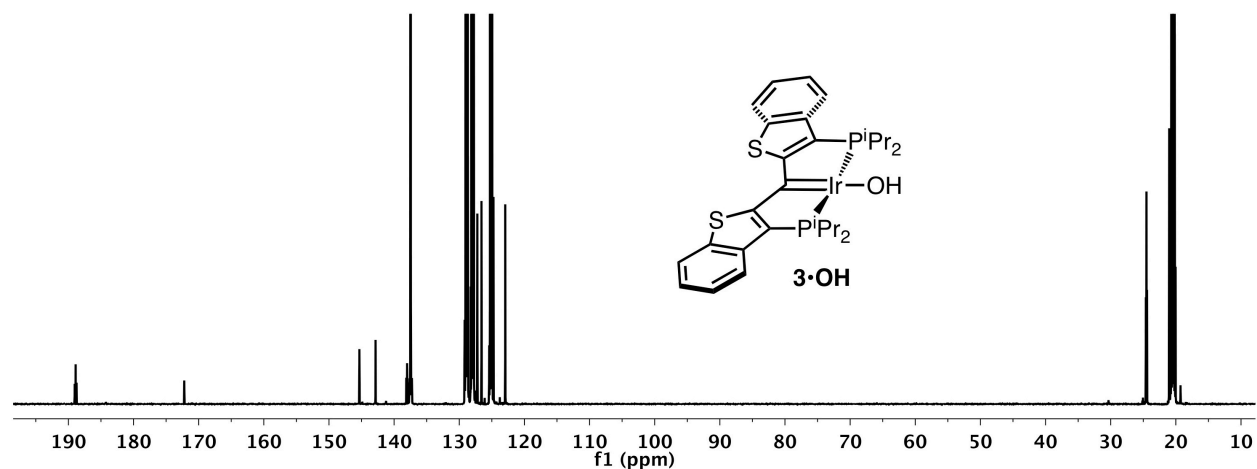

**Figure S11.**  $^{13}\text{C}\{^1\text{H}\}$  NMR spectrum of **3-OH** in toluene- $d_8$ .

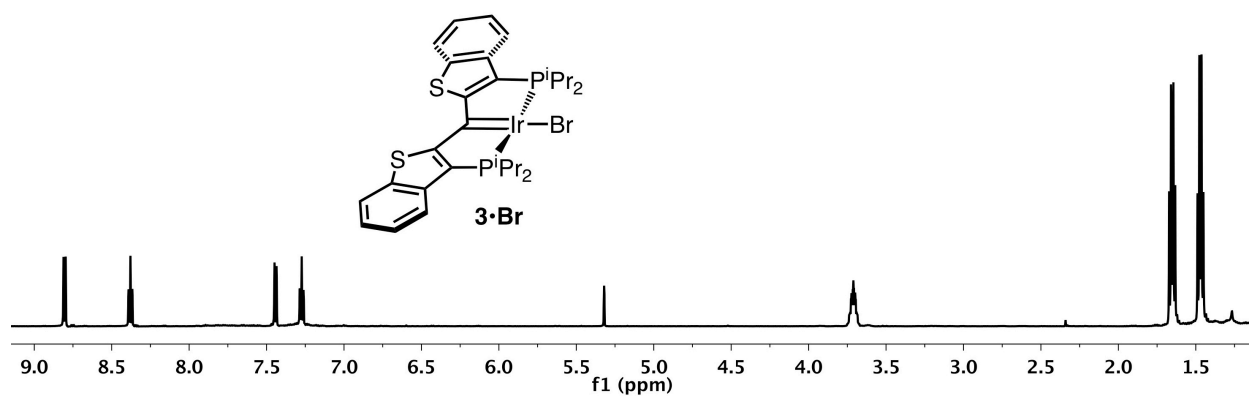

**Figure S12.**  $^1\text{H}$  NMR spectrum of **3-Br** in  $\text{CD}_2\text{Cl}_2$ .

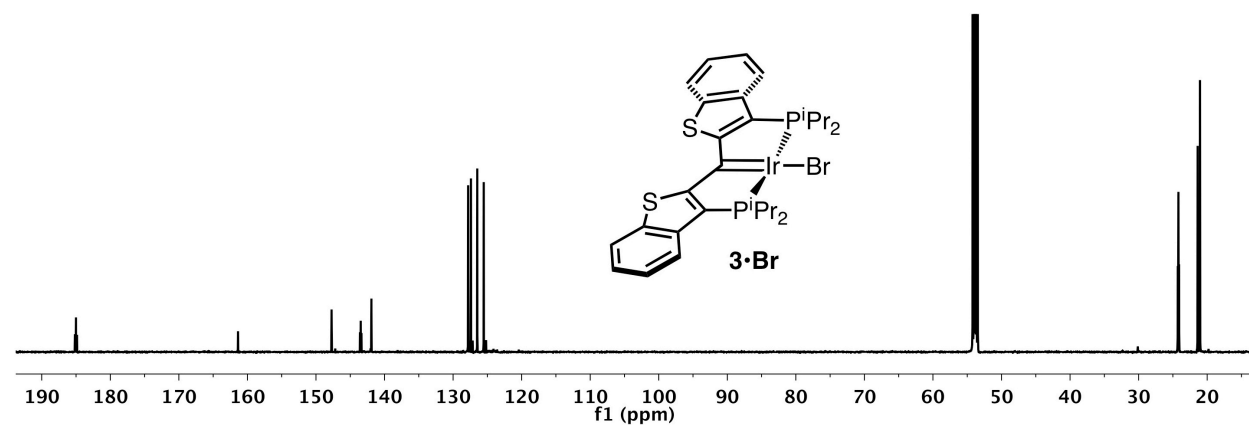

**Figure S13.**  $^{13}\text{C}\{^1\text{H}\}$  NMR spectrum of **3-Br** in  $\text{CD}_2\text{Cl}_2$ .

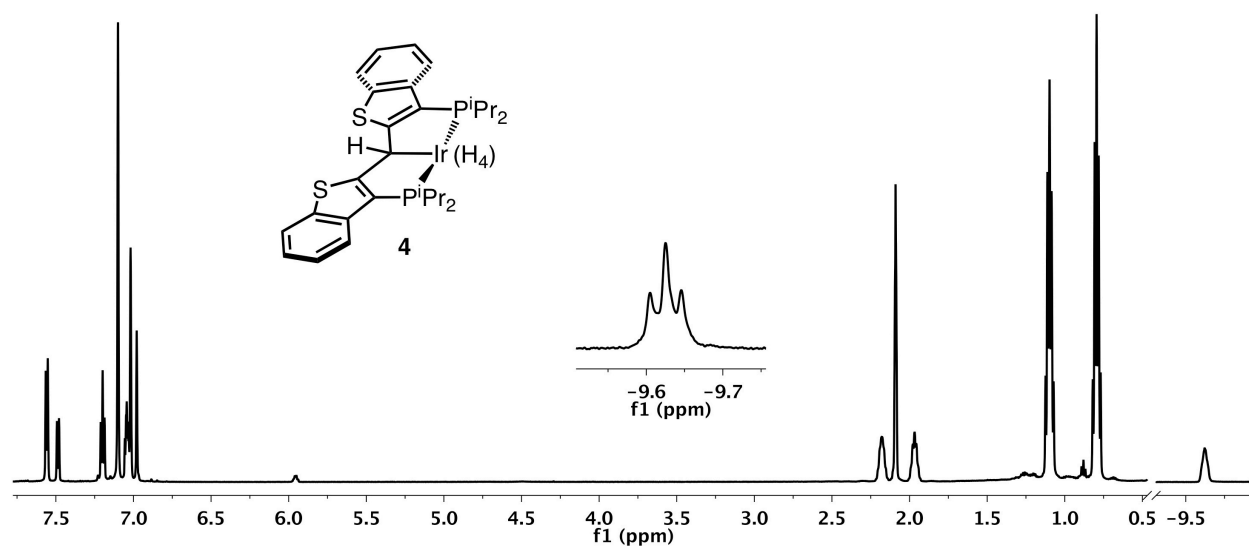

**Figure S14.**  $^1\text{H}$  NMR spectrum of **4** in  $\text{toluene-}d_8$ . The inset shows a triplet at -9.63 ppm before full conversion to **4** and before substantial H/D exchange had occurred.

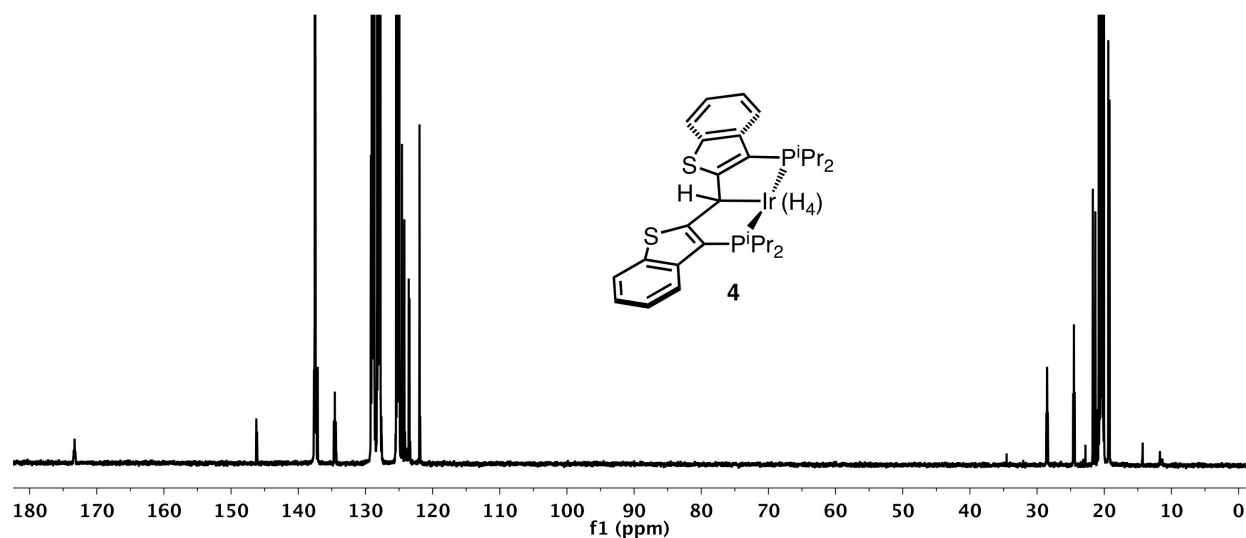

**Figure S15.**  $^{13}\text{C}\{^1\text{H}\}$  NMR spectrum of **4** in  $\text{toluene-}d_8$ .

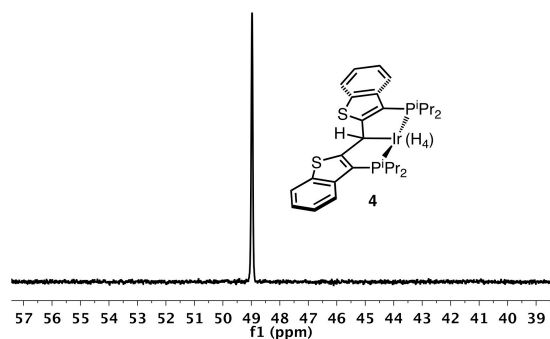

**Figure S16.**  $^{31}\text{P}\{^1\text{H}\}$  NMR spectrum of **4** in  $\text{toluene-}d_8$ .



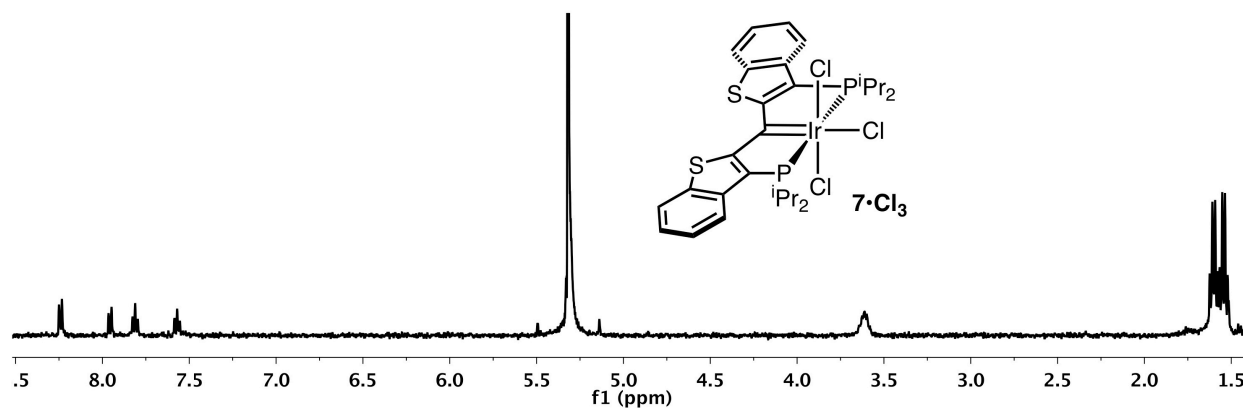

**Figure S17.**  $^1\text{H}$  NMR spectrum of  $7 \cdot \text{Cl}_3$  in  $\text{CD}_2\text{Cl}_2$ .

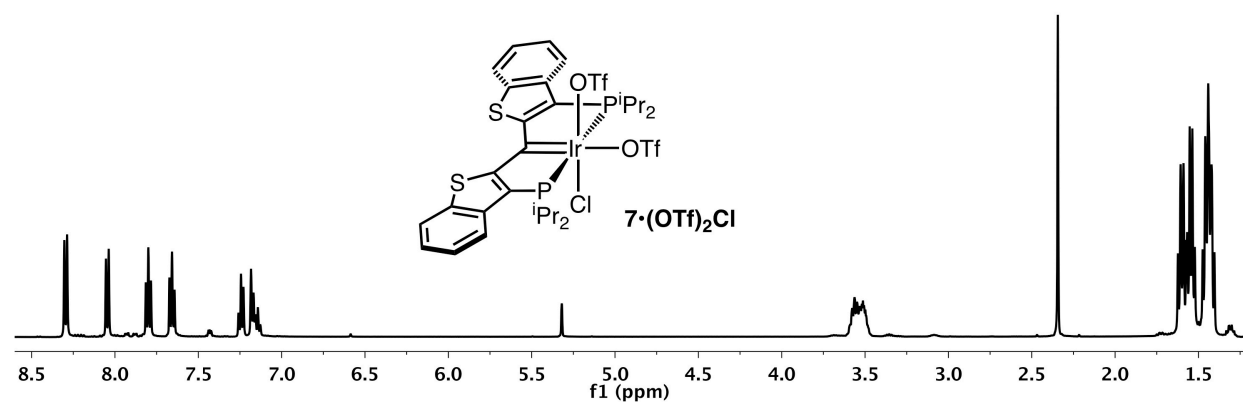

**Figure S18.**  $^1\text{H}$  NMR spectrum of  $7 \cdot (\text{OTf})_2\text{Cl}$  in  $\text{CD}_2\text{Cl}_2$ .

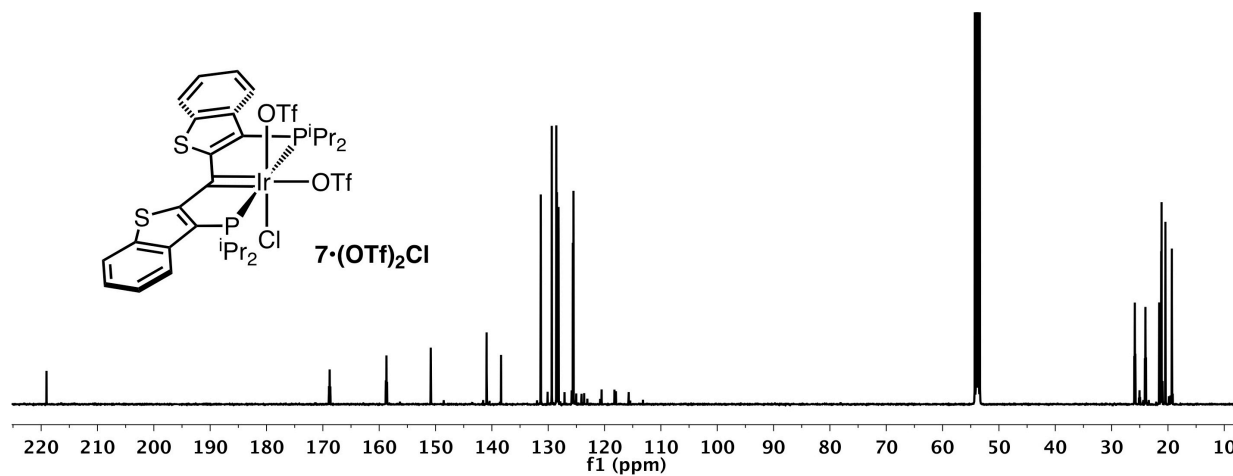

**Figure S19.**  $^{13}\text{C}\{^1\text{H}\}$  NMR spectrum of  $7 \cdot (\text{OTf})_2\text{Cl}$  in  $\text{CD}_2\text{Cl}_2$ .

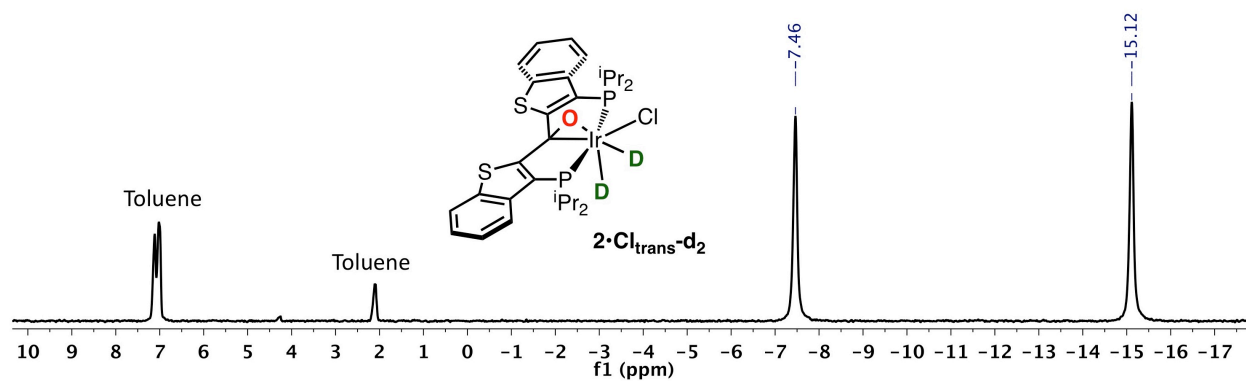

**Figure S20.**  $^2\text{H}$  NMR spectrum of  $2\cdot\text{Cl}_{\text{trans}}\text{-d}_2$  in toluene.

**Table S1.** Data collection and structure refinement details for **3•OH**, **1•OH**, **1•Br**, **7•Cl<sub>3</sub>**, **7•(OTf)<sub>2</sub>Cl**, and **8**.

|                                       | <b>3•OH</b>                                                      | <b>1•OH</b>                                                                                                          | <b>1•Br</b>                                                                                           | <b>7•Cl<sub>3</sub></b>                                                                                            | <b>7•(OTf)<sub>2</sub>Cl</b>                                                                                                       | <b>8</b>                                                                                                                             |
|---------------------------------------|------------------------------------------------------------------|----------------------------------------------------------------------------------------------------------------------|-------------------------------------------------------------------------------------------------------|--------------------------------------------------------------------------------------------------------------------|------------------------------------------------------------------------------------------------------------------------------------|--------------------------------------------------------------------------------------------------------------------------------------|
| formula                               | C <sub>29</sub> H <sub>37</sub> IrOP <sub>2</sub> S <sub>2</sub> | 2(C <sub>29</sub> H <sub>36</sub> IrO <sub>2</sub> P <sub>2</sub> S <sub>2</sub> ),<br>C <sub>7</sub> H <sub>8</sub> | C <sub>29</sub> H <sub>36</sub> BrIrOP <sub>2</sub> S <sub>2</sub> ,<br>C <sub>7</sub> H <sub>8</sub> | C <sub>29</sub> H <sub>36</sub> Cl <sub>3</sub> IrP <sub>2</sub> S <sub>2</sub> ,<br>C <sub>7</sub> H <sub>8</sub> | C <sub>31</sub> H <sub>36</sub> ClF <sub>6</sub> IrO <sub>6</sub> P <sub>2</sub> S <sub>4</sub><br>CO <sub>3</sub> SF <sub>3</sub> | C <sub>30</sub> H <sub>38</sub> ClF <sub>3</sub> IrO <sub>4</sub> P <sub>2</sub> S <sub>3</sub> ,<br>CO <sub>3</sub> SF <sub>3</sub> |
| fw                                    | 719.84                                                           | 1561.81                                                                                                              | 890.88                                                                                                | 901.32                                                                                                             | 1036.43                                                                                                                            | 1054.44                                                                                                                              |
| crystal system                        | monoclinic                                                       | triclinic                                                                                                            | monoclinic                                                                                            | monoclinic                                                                                                         | monoclinic                                                                                                                         | monoclinic                                                                                                                           |
| space group                           | P2 <sub>1</sub> /c                                               | P-1                                                                                                                  | P2 <sub>1</sub> /n                                                                                    | P2 <sub>1</sub> /c                                                                                                 | C2/c                                                                                                                               | C2/c                                                                                                                                 |
| a, Å                                  | 13.5212(3)                                                       | 12.8155(7)                                                                                                           | 14.5417(3)                                                                                            | 12.4862(3)                                                                                                         | 29.3975(5)                                                                                                                         | 27.4764(5)                                                                                                                           |
| b, Å                                  | 15.0131(4)                                                       | 14.1374(8)                                                                                                           | 11.2071(2)                                                                                            | 13.6671(5)                                                                                                         | 17.9182(3)                                                                                                                         | 20.4688(4)                                                                                                                           |
| c, Å                                  | 16.0250(2)                                                       | 19.4358(11)                                                                                                          | 22.7055(5)                                                                                            | 23.6020(6)                                                                                                         | 23.5916(6)                                                                                                                         | 18.4422(4)                                                                                                                           |
| α, deg                                | 90                                                               | 105.409(2)                                                                                                           | 90                                                                                                    | 90                                                                                                                 | 90                                                                                                                                 | 90                                                                                                                                   |
| β, deg                                | 116.7160(10)                                                     | 103.594(2)                                                                                                           | 106.9590(10)                                                                                          | 118.383(2)                                                                                                         | 122.6490(10)                                                                                                                       | 112.8740(10)                                                                                                                         |
| γ, deg                                | 90                                                               | 93.729(2)                                                                                                            | 90                                                                                                    | 90                                                                                                                 | 90                                                                                                                                 | 90                                                                                                                                   |
| V, Å <sup>3</sup>                     | 2905.73(11)                                                      | 3269.0(3)                                                                                                            | 3539.41(13)                                                                                           | 3543.51(19)                                                                                                        | 10463.3(4)                                                                                                                         | 9556.4(3)                                                                                                                            |
| Z                                     | 4                                                                | 2                                                                                                                    | 4                                                                                                     | 4                                                                                                                  | 8                                                                                                                                  | 8                                                                                                                                    |
| T, K                                  | 173(2)                                                           | 173(2)                                                                                                               | 173(2)                                                                                                | 173(2)                                                                                                             | 173(2)                                                                                                                             | 173(2)                                                                                                                               |
| λ, Å                                  | 0.71073                                                          | 1.54178                                                                                                              | 1.54178                                                                                               | 0.71073                                                                                                            | 1.54178                                                                                                                            | 1.54178                                                                                                                              |
| ρ <sub>calc</sub> , g/cm <sup>3</sup> | 1.645                                                            | 1.587                                                                                                                | 1.672                                                                                                 | 1.689                                                                                                              | 1.316                                                                                                                              | 1.466                                                                                                                                |
| F(000)                                | 1432                                                             | 1560                                                                                                                 | 1768                                                                                                  | 1800                                                                                                               | 4096                                                                                                                               | 4176                                                                                                                                 |
| μ, mm <sup>-1</sup>                   | 4.869                                                            | 10.236                                                                                                               | 10.789                                                                                                | 4.229                                                                                                              | 7.944                                                                                                                              | 8.724                                                                                                                                |
| crystal size, mm <sup>3</sup>         | 0.08×0.06×0.04                                                   | 0.25×0.150×0.110                                                                                                     | 0.20×0.20×0.20                                                                                        | 0.04×0.04×0.02                                                                                                     | 0.15×0.1×0.1                                                                                                                       | 0.18×0.09×0.09                                                                                                                       |
| transmission factors                  | 0.6967 – 0.8291                                                  | 0.552 – 0.753                                                                                                        | 0.3974 – 0.5230                                                                                       | 0.8491 – 0.9202                                                                                                    | 0.3820 – 0.5038                                                                                                                    | 0.4746 – 0.7531                                                                                                                      |
| θ range, deg                          | 1.966 – 24.999                                                   | 2.444 – 67.493                                                                                                       | 3.235 – 67.490                                                                                        | 2.379 – 24.998                                                                                                     | 3.045 – 66.500                                                                                                                     | 3.308 – 68.419                                                                                                                       |
| data/restraints/param                 | 5061/2/320                                                       | 11415/729/730                                                                                                        | 6367/387/397                                                                                          | 6180/570/425                                                                                                       | 9117/0/468                                                                                                                         | 8633/150/525                                                                                                                         |
| GoF                                   | 1.044                                                            | 1.031                                                                                                                | 1.073                                                                                                 | 1.132                                                                                                              | 1.018                                                                                                                              | 1.037                                                                                                                                |
| R <sub>1</sub> (>2σ(I))               | 0.0276                                                           | 0.0356                                                                                                               | 0.0201                                                                                                | 0.0552                                                                                                             | 0.0497                                                                                                                             | 0.0391                                                                                                                               |
| wR <sub>2</sub> (all data)            | 0.0682                                                           | 0.0917                                                                                                               | 0.0497                                                                                                | 0.1511                                                                                                             | 0.1441                                                                                                                             | 0.1089                                                                                                                               |
| residual density, e/Å <sup>3</sup>    | 1.216 and -0.659                                                 | 2.780 and -1.149                                                                                                     | 0.439 and -0.849                                                                                      | 1.332 and -0.798                                                                                                   | 2.243 and -0.732                                                                                                                   | 0.982 and -0.870                                                                                                                     |
